# Supplementary material for: Integrated analysis of DNA methylation and mRNA expression profiles to identify key genes in head and neck squamous cell carcinoma
Source: PubMed Central journal article supplement (PMC6981101; doi:10.1042/bsr20193349), 2020-01-24
Supplement: BSR-2019-3349_supp.pdf [file BSR-2019-3349_supp.pdf]

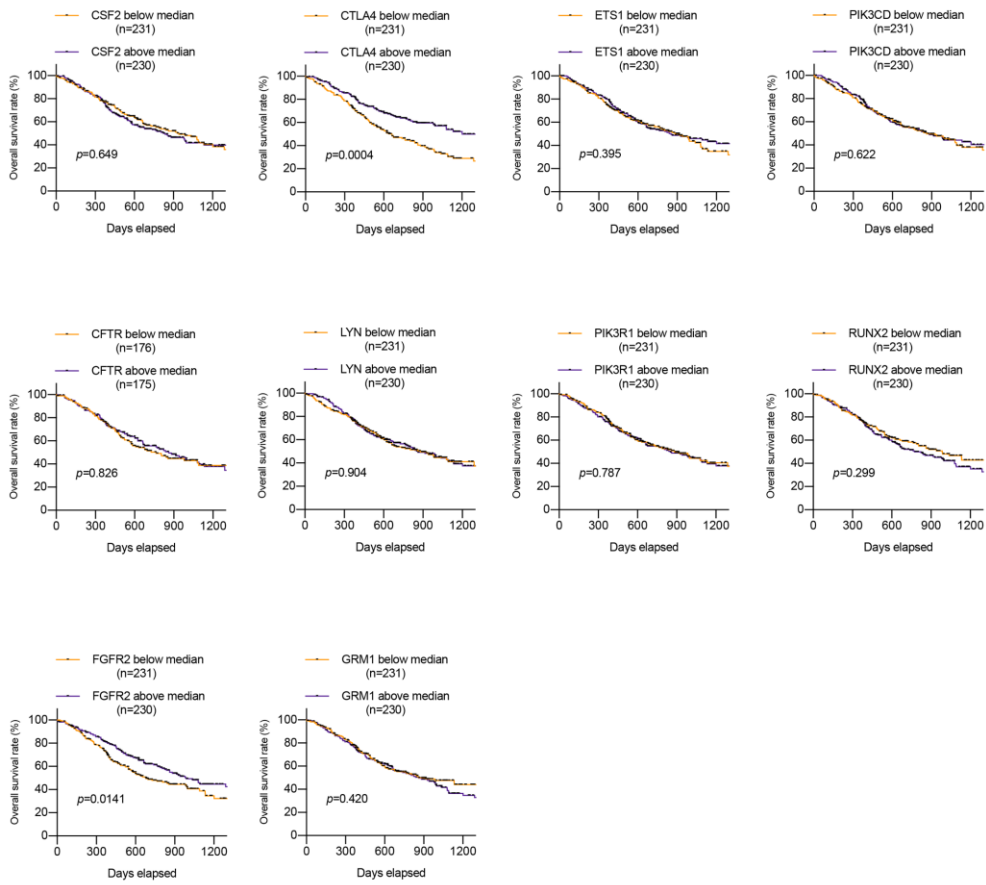

Figure S1. The prognostic value of hub genes in the overall survival of HNSCC patients based on TCGA data.

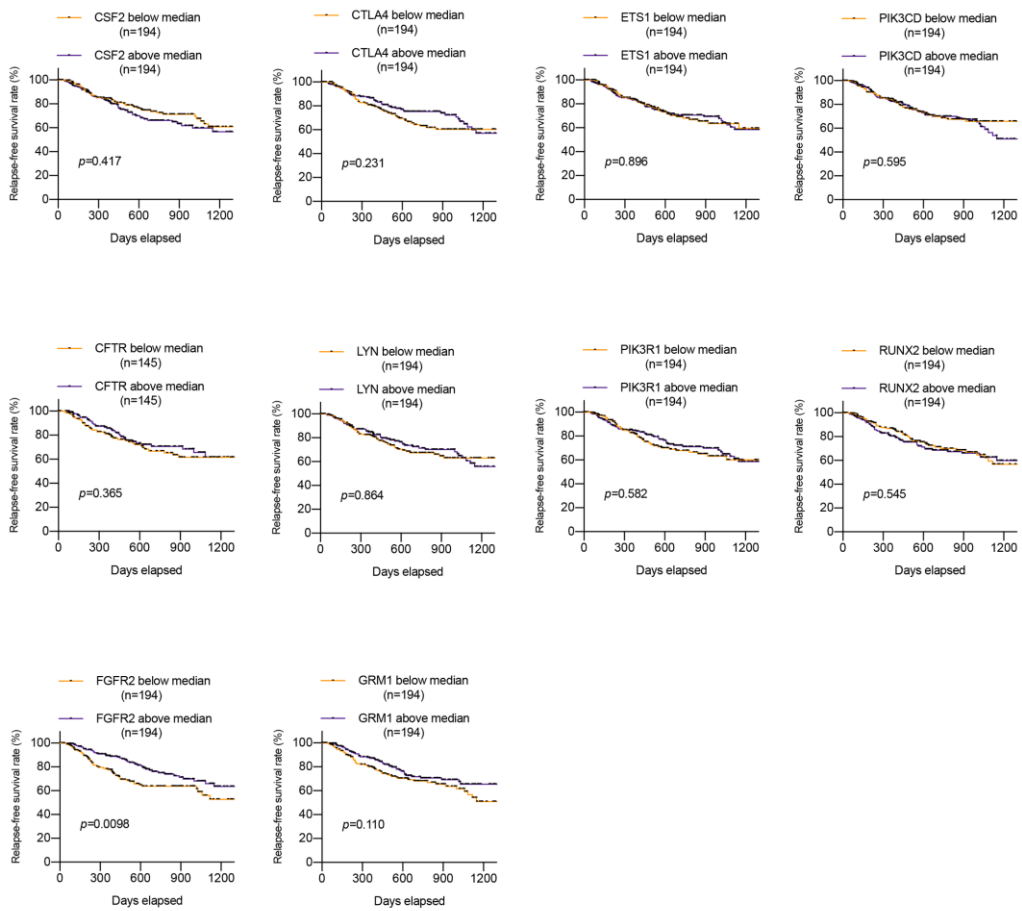

Figure S2. The relationship of hub genes with the relapse-free survival of HNSCC patients based on TCGA data.

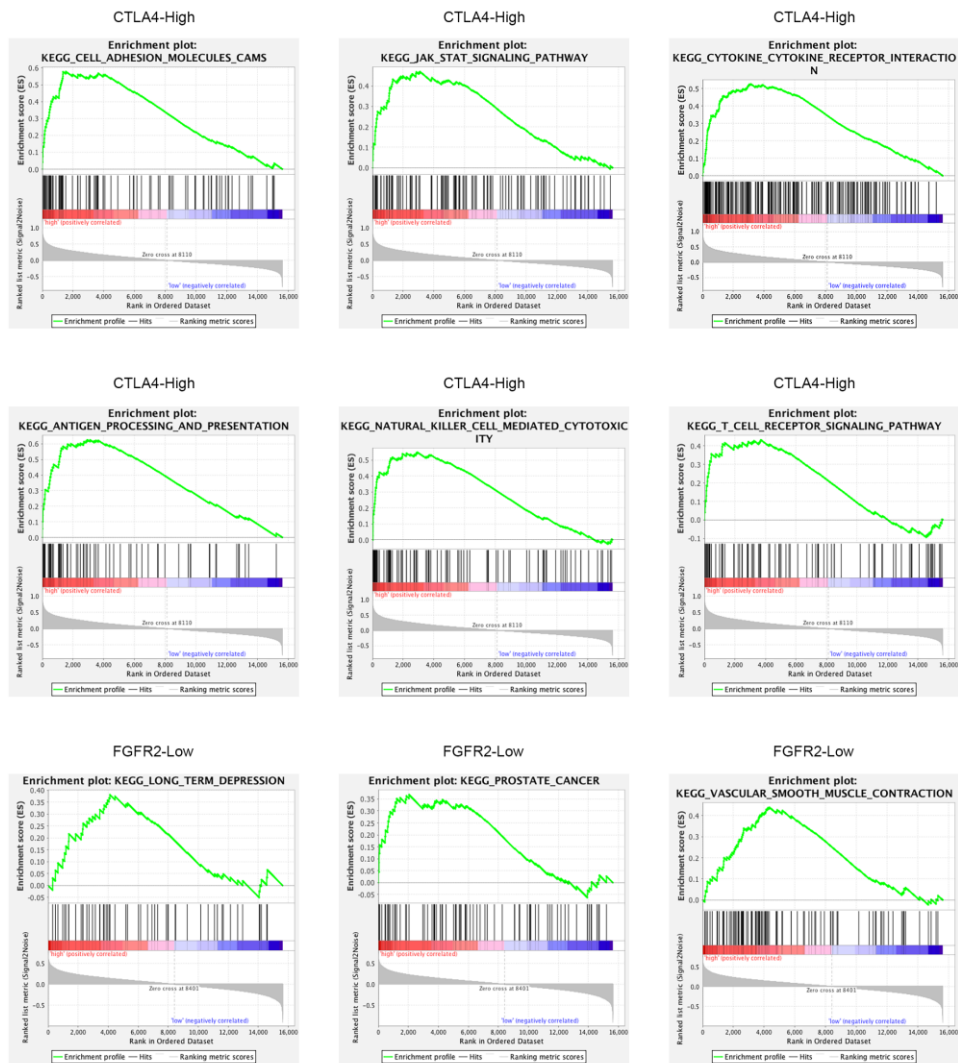

Figure S3. Gene set enrichment analysis (GSEA) for expression profiles in HNSCC samples with relative higher expression of CTLA4 or FGFR2.
